# Supplementary material for: Measurement report: Observations of ground-level ozone concentration gradients perpendicular to the Lake Ontario shoreline
Source: Copernicus journal article supplement (doi:10.5194/acp-24-2387-2024), 2024-02-26
Supplement: Supplementary file 1 [file acp-24-2387-2024-supplement.pdf]

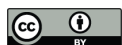

*Supplement of*

## **Measurement report: Observations of ground-level ozone concentration gradients perpendicular to the Lake Ontario shoreline**

**Yao Yan Huang and D. James Donaldson**

*Correspondence to:* D. James Donaldson ([james.donaldson@utoronto.ca](mailto:james.donaldson@utoronto.ca))

The copyright of individual parts of the supplement might differ from the article licence.

## Sampling Sites

**Table S1.** Site ID, name, location (latitude and longitude), elevation (m), distance from Oshawa (m), distance from shore (m) for the 37 locations selected for ozone sampling in Oshawa and Toronto, Ontario.

## Instrument Calibration

**Table S2.** Ozone mixing ratio (ppb) measured March 7th, 2023, next to Ontario air quality monitoring station Toronto Downtown (station ID 31129).

**Table S3.** Ozone mixing ratio (ppb) measured July 19th, 2023, next to Ontario air quality monitoring station Oshawa (station ID 45027).

## Summer Parallel Ozone Gradient

**Figure S1.** Ozone concentrations against distance from Oshawa GO station (ID 19) in summer 2022.

**Figure S2.** Ozone concentration in parallel to shore transect against distance from shore in summer 2022.

## Ontario Air Quality Monitoring Station Data

**Table S4.** Mean and variance of average daily O<sub>3</sub> mixing ratios (ppb) from Ontario air quality monitoring stations Oshawa (station ID 45027) and Toronto Downtown (station ID 31129) in January and July 2021.

**Table S5.** Mean and variance of average daily NO<sub>2</sub> mixing ratios (ppb) from Ontario air quality monitoring stations in Oshawa (station ID 45027) and Toronto Downtown (station ID 31129) in January and July 2021.

## Nearshore Slopes

**Table S6.** Rate of O<sub>3</sub> concentration decrease from shore in Toronto based on least-squares linear regression.

**Table S7.** Rate of O<sub>3</sub> concentration decrease from shore in Oshawa based on least-squares linear regression. Mean slope was calculated and reported with 1 standard deviation.

## Summer 2023 Ozone Measurements

**Figure S3.** Scatter plot of average O<sub>3</sub> (ppb) to distance from the shore of Lake Ontario (m) with linear regression within 1 km measured in Oshawa summer 2023.

**Figure S4.** Scatter plot of average O<sub>3</sub> (ppb) to distance from the shore of Lake Ontario (m) with linear regression within 1 km measured in Toronto summer 2023.

## Wind Speed Plot

**Figure S5.** Scatter plot of average O<sub>3</sub> (ppb) to wind speed (km/h) measured in Toronto summer 2022 using data from all sampling days.

## Sampling Sites

**Table S1.** Site ID, name, location (latitude and longitude), elevation (m), distance from Oshawa (m), distance from shore (m) for the 37 locations selected for ozone sampling in Oshawa and Toronto, Ontario. Distance from Oshawa is measured from ID 19. Sites measured in each season are marked with a Yes/No if they were sampled.

| Site ID | Name                            | Summer | Winter | Distance from Shore (m) | Distance from Oshawa (km) | Latitude (decimal degrees) | Longitude (decimal degrees) |
|---------|---------------------------------|--------|--------|-------------------------|---------------------------|----------------------------|-----------------------------|
| 1       | Conlin Rd.                      | Yes    | No     | 11000                   | -                         | 43.56886                   | -78.53789                   |
| 2       | Taunton Rd.                     | Yes    | No     | 8970                    | -                         | 44.55982                   | -78.52755                   |
| 3       | Rossland Rd.                    | Yes    | No     | 6890                    | -                         | 43.54915                   | -78.52283                   |
| 4       | Adelaide Ave.                   | Yes    | No     | 5550                    | -                         | 43.54219                   | -78.51983                   |
| 5       | Olive Ave.                      | Yes    | No     | 3790                    | -                         | 43.5332                    | -78.51578                   |
| 6       | Bloor St.                       | Yes    | No     | 2840                    | -                         | 43.52839                   | -78.51364                   |
| 7       | Wentworth St.                   | Yes    | No     | 1860                    | -                         | 43.52462                   | -78.5073                    |
| 8       | Harbour Rd.<br>Oshawa           | No     | Yes    | 873                     | -                         | 43.52114                   | -78.50085                   |
| 9       | Trail Entrance                  | Yes    | Yes    | 636                     | -                         | 43.52038                   | -78.49937                   |
| 10      | Valley Dr.                      | Yes    | Yes    | 426                     | -                         | 43.5192                    | -78.49809                   |
| 11      | Lakeview Park<br>Ave.           | Yes    | Yes    | 306                     | -                         | 43.51936                   | -78.49749                   |
| 12      | Lakeview Park<br>Parking Lot    | No     | Yes    | 195                     | -                         | 43.51899                   | -78.49688                   |
| 13      | Lakeview Park<br>Beach          | Yes    | Yes    | 42                      | -                         | 43.51872                   | -78.49555                   |
| 14      | Lakeview Park<br>Lighthouse     | Yes    | No     | -134                    | -                         | 43.51859                   | -78.49339                   |
| 15      | Lakeview Park<br>Mandela Gazebo | Yes    | Yes    | 19                      | -                         | 43.51649                   | -78.49834                   |
| 16      | Lakewoods Park<br>Lookout       | Yes    | Yes    | 10                      | -                         | 43.51478                   | -78.49907                   |
| 17      | Birchcliffe Bus<br>Stop         | Yes    | Yes    | 443                     | -                         | 43.51724                   | -78.50054                   |
| 18      | Lakeview Park<br>Rocks          | No     | Yes    | -34                     | -                         | 43.51776                   | -78.49581                   |
| 19      | Oshawa GO                       | Yes    | No     | 1950                    | 0                         | 43.87084                   | -78.88526                   |
| 20      | Whitby GO                       | Yes    | No     | 1560                    | 4.34                      | 43.86487                   | -78.93833                   |
| 21      | Ajax GO                         | Yes    | No     | 3540                    | 12.8                      | 43.84845                   | -79.04103                   |
| 22      | Pickering GO                    | Yes    | No     | 2040                    | 16.7                      | 43.83184                   | -79.08418                   |
| 23      | Rouge Hill GO                   | Yes    | No     | 70                      | 22.1                      | 43.78027                   | -79.13064                   |
| 24      | UTSC                            | Yes    | No     | 3640                    | 25.9                      | 43.78438                   | -79.18383                   |
| 25      | Bloor St.                       | Yes    | No     | 3580                    | -                         | 43.6685                    | -79.39418                   |
| 26      | College St.                     | Yes    | No     | 2560                    | -                         | 43.65998                   | -79.39089                   |
| 27      | Queen St.                       | Yes    | No     | 1520                    | -                         | 43.6511                    | -79.3869                    |
| 28      | King St                         | Yes    | No     | 1120                    | -                         | 43.64755                   | -79.3849                    |
| 29      | Front St.                       | Yes    | Yes    | 820                     | -                         | 43.6452                    | -79.38229                   |
| 30      | Bremner Blvd..                  | Yes    | Yes    | 548                     | -                         | 43.64314                   | -79.38111                   |
| 31      | Lakeshore Blvd                  | Yes    | Yes    | 437                     | -                         | 43.64196                   | -79.38095                   |

|    |                           |     |     |     |   |          |           |
|----|---------------------------|-----|-----|-----|---|----------|-----------|
| 32 | Harbour St.               | Yes | Yes | 328 | - | 43.64073 | -79.38071 |
| 33 | Queen's Quay              | Yes | Yes | 224 | - | 43.64006 | -79.38048 |
| 34 | Waterfront East<br>Middle | No  | Yes | 100 | - | 43.63885 | -79.38016 |
| 35 | Waterfront East           | Yes | Yes | 15  | - | 43.63817 | -79.37971 |
| 36 | Waterfront West           | Yes | Yes | 20  | - | 43.63781 | -79.38352 |
| 37 | Ann Tindal Park           | Yes | Yes | 106 | - | 43.63858 | -79.38405 |

---

## Instrument Calibration

**Table S2.** Ozone mixing ratio (ppb) measured March 7th, 2023, next to Ontario air quality monitoring station Toronto Downtown (station ID 31129). Toronto Downtown Station at 5:00 PM recorded 41 ppb and falls within 1 standard deviations of measured mean.

| Time    | Ozone (ppb) |
|---------|-------------|
| 5:10 PM | 43          |
| 5:11 PM | 41          |
| 5:12 PM | 42          |
| 5:13 PM | 41          |
| 5:14 PM | 39          |
| 5:15 PM | 41          |
| 5:16 PM | 39          |
| 5:17 PM | 42          |
| 5:18 PM | 39          |
| 5:19 PM | 39          |
| Mean    | 40.6        |
| SD      | 1.4         |

**Table S3.** Ozone mixing ratio (ppb) measured July 19th, 2023, next to Ontario air quality monitoring station Oshawa (station ID 45027). Oshawa Station at 4:00 PM recorded 33 ppb and falls within 1 standard deviations of measured mean.

| Time    | Ozone (ppb) |
|---------|-------------|
| 4:20 PM | 34          |
| 4:21 PM | 27          |
| 4:22 PM | 31          |
| 4:23 PM | 34          |
| 4:24 PM | 34          |
| 4:25 PM | 33          |
| 4:26 PM | 29          |
| 4:27 PM | 31          |
| 4:28 PM | 28          |
| 4:29 PM | 33          |
| Mean    | 31.4        |
| SD      | 2.5         |

### Summer Parallel Ozone Gradient

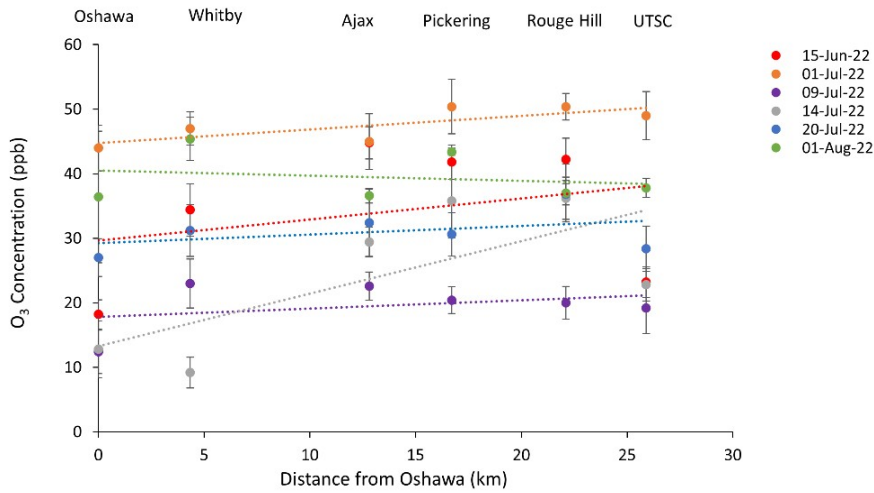

**Figure S1.** Ozone concentrations against distance from Oshawa GO station (ID 19) in summer 2022.

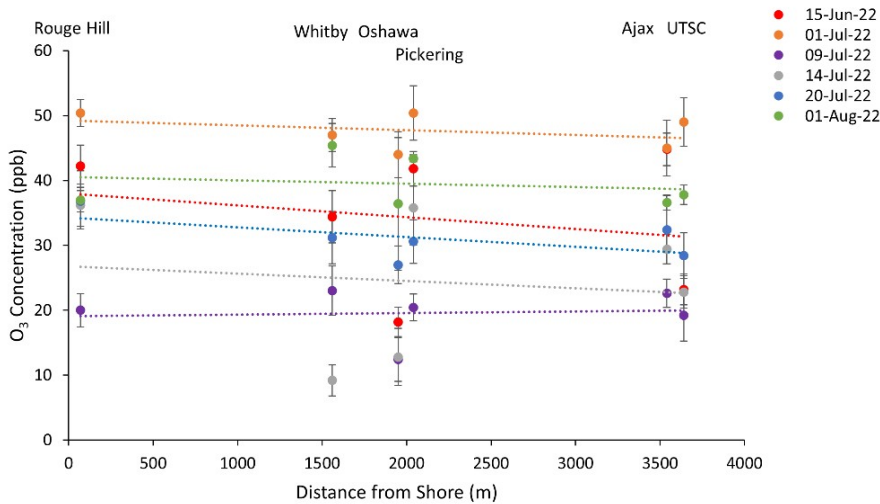

**Figure S2.** Ozone concentration in parallel to shore transect against distance from shore in summer 2022.

Figure S1 shows a slight increase in ozone regionally starting from Oshawa (ID 19) and moving west towards Scarborough on all days except August 1<sup>st</sup>, 2022. Oshawa typically had the lowest ozone concentration, peaking at Pickering (ID 22) and Rouge Hill (ID 23), followed up a slight decrease at the University of Toronto Scarborough (ID 24). This was likely the influence of greater pollution emissions further west towards the Greater Toronto Area and major urban centres. The mean increase is  $0.26 \pm 0.28$  ppb/km (1 standard deviation) and a low linear regression  $R^2$  below 0.5 on all days except July 1<sup>st</sup>, 2022. Historical data from Ontario air quality monitoring stations in Toronto and Oshawa in summer also shows that ozone concentrations did not vary considerably between the cities (see Table S4).

Figure S2 shows that the ozone gradients can not be observed when not measured at perpendicular transects to the lakeshore. There is slight negative trend for ozone versus distance to shore observed on all days except July 9<sup>th</sup>, 2022, and mean slope of  $-0.91 \pm 0.0007$  ppb/km (1 standard deviation), which is not comparable to those observed nearshore. Linear regression  $R^2$  was also poor.

## Ontario Air Quality Monitoring Station Data

**Table S4.** Mean and variance of average daily O<sub>3</sub> mixing ratios (ppb) from Ontario air quality monitoring stations Oshawa (station ID 45027) and Toronto Downtown (station ID 31129) in January and July 2021. Average daily values calculated from 01:00 to 24:00 EDT of a single day. P-values determined from two-sample t-test assuming unequal variance, alpha = 0.05.

|                | Average Daily Ozone July 2021 |                  | Average Daily Ozone January 2021 |                  |
|----------------|-------------------------------|------------------|----------------------------------|------------------|
|                | Oshawa                        | Toronto Downtown | Oshawa                           | Toronto Downtown |
| Mean (ppb)     | 23.5                          | 26.6             | 26.3                             | 20.1             |
| Variance (ppb) | 44.6                          | 48.0             | 48.0                             | 28.5             |
| p-value        | 0.08                          |                  | 0.0002                           |                  |

**Table S5.** Mean and variance of average daily NO<sub>2</sub> mixing ratios (ppb) from Ontario air quality monitoring stations in Oshawa (station ID 45027) and Toronto Downtown (station ID 31129) in January and July 2021. Average daily values calculated from 01:00 to 24:00 EDT of a single day. P-values determined from two-sample t-test assuming unequal variance, alpha = 0.05.

|                | Average Daily NO <sub>2</sub> July 2021 |                  | Average Daily NO <sub>2</sub> January 2021 |                  |
|----------------|-----------------------------------------|------------------|--------------------------------------------|------------------|
|                | Oshawa                                  | Toronto Downtown | Oshawa                                     | Toronto Downtown |
| Mean (ppb)     | 2.1                                     | 9.6              | 4.3                                        | 12.6             |
| Variance (ppb) | 0.5                                     | 7.5              | 13.6                                       | 9.3              |
| p-value        | 2E-16                                   |                  | 8E-14                                      |                  |

## Nearshore Slopes

**Table S6.** Rate of O<sub>3</sub> concentration decrease from shore in Toronto based on least-squares linear regression. Mean slope was calculated and reported with 1 standard deviation. P-values indicated. The occurrence of lake-breeze on each sampling date using criteria by Laird et al., (2001) are reported.

| Summer    |                  |                |             | Winter    |                               |                |             |
|-----------|------------------|----------------|-------------|-----------|-------------------------------|----------------|-------------|
| Date      | Slope (ppb/m)    | R <sup>2</sup> | Lake-breeze | Date      | Slope (ppb/m)                 | R <sup>2</sup> | Lake-breeze |
| 26-Jul-22 | -0.0166          | 0.478          | Yes         | 02-Dec-22 | -0.0301**                     | 0.910          | No          |
| 29-Jul-22 | -0.0162 *        | 0.740          | Yes         | 10-Dec-22 | -0.0003                       | 0.00013        | No          |
| 02-Aug-22 | -0.0086          | 0.204          | No          | 19-Dec-22 | -0.0113 *                     | 0.443          | No          |
| 06-Aug-22 | -0.0104          | 0.425          | Yes         | 19-Jan-23 | -0.0133 *                     | 0.773          | No          |
| 13-Aug-22 | -0.0290 *        | 0.595          | Yes         | 26-Jan-23 | -0.0159 *                     | 0.443          | No          |
| 16-Aug-22 | -0.0118          | 0.436          | Yes         | 02-Feb-23 | -0.0083                       | 0.298          | No          |
|           |                  |                |             | 14-Feb-23 | -0.0216 *                     | 0.762          | Yes         |
| Mean      | -0.0154 ± 0.0067 |                |             | Mean      | -0.0167 ± 0.0073 <sup>a</sup> |                |             |

<sup>a</sup> data from 10-Dec-22 was removed due to low R<sup>2</sup>

\* p < 0.05

\*\* p < 0.001

**Table S7.** Rate of O<sub>3</sub> concentration decrease from shore in Oshawa based on least-squares linear regression. Mean slope was calculated and reported with 1 standard deviation. P-values indicated.

| Summer    |                  |                | Winter    |                    |                |
|-----------|------------------|----------------|-----------|--------------------|----------------|
| Date      | Slope (ppb/m)    | R <sup>2</sup> | Date      | Slope (ppb/m)      | R <sup>2</sup> |
| 10-Jun-22 | -0.0158          | 0.347          | 04-Dec-22 | -0.0195 **         | 0.882          |
| 21-Jun-22 | -0.0270          | 0.448          | 08-Dec-22 | -0.0064 *          | 0.409          |
| 03-Jul-22 | -0.0153          | 0.247          | 29-Dec-22 | -0.0076 *          | 0.543          |
| 08-Jul-22 | -0.0325          | 0.571          | 07-Jan-23 | -0.0075            | 0.349          |
| 10-Jul-22 | -0.0287 *        | 0.688          | 20-Jan-23 | -0.0079 *          | 0.718          |
| 22-Jul-22 | -0.0340          | 0.278          | 27-Jan-23 | -0.0060 *          | 0.799          |
| 23-Jul-22 | -0.0115 *        | 0.705          | 20-Feb-23 | -0.0017            | 0.381          |
| Mean      | -0.0235 ± 0.0085 |                | Mean      | -0.00809 ± 0.00506 |                |

\* p < 0.05

\*\* p < 0.001



**Summer 2023 Ozone Measurements**

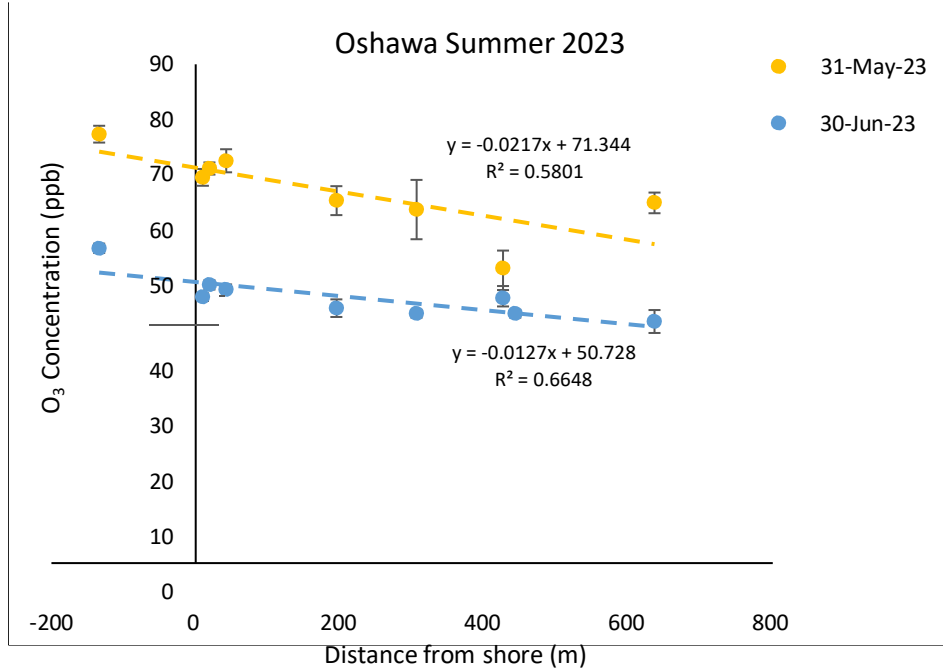

**Figure S3.** Scatter plot of average O<sub>3</sub> (ppb) to distance from the shore of Lake Ontario (m) with linear regression within 1 km measured in Oshawa summer 2023. Error bars represent ± 1 standard deviation from the mean of five consecutive 1 min measurements. Linear regression p-value for both days < 0.05.

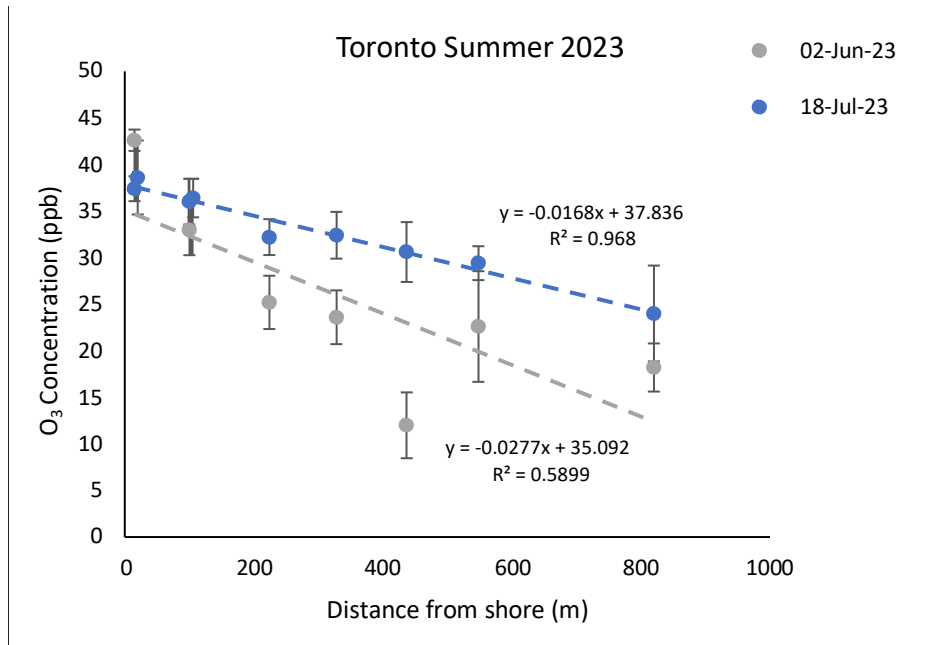

**Figure S4.** Scatter plot of average O<sub>3</sub> (ppb) to distance from the shore of Lake Ontario (m) with linear regression within 1 km measured in Toronto summer 2023. Error bars represent ± 1 standard deviation from the mean of five consecutive 1 min measurements. Linear regression p-value for June 2<sup>nd</sup>, 2023 < 0.05.

### Wind Speed Plot

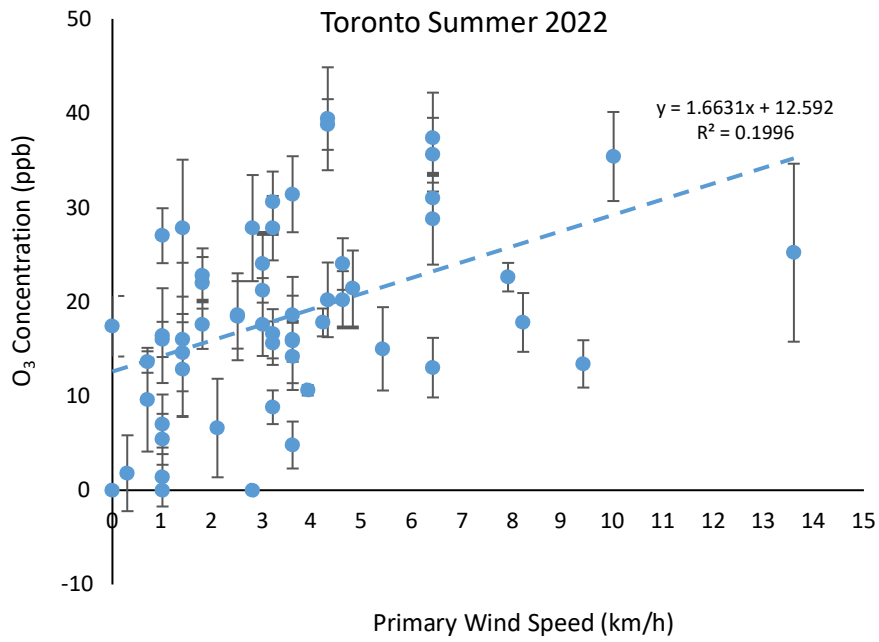

**Figure S5.** Scatter plot of average O<sub>3</sub> (ppb) to wind speed (km/h) measured in Toronto summer 2022 using data from all sampling days. Error bars for ozone represent ± 1 standard deviation from the mean of five consecutive 1 min measurements. Linear regression p-value < 0.001.
